# Supplementary material for: miR-146b-5p functions as a tumor suppressor by targeting TRAF6 and predicts the prognosis of human gliomas
Source: PubMed Central journal article supplement (PMC4745716; doi:10.18632/oncotarget.4895), 2015-08-06
Supplement: oncotarget-06-29129-s001.pdf [file oncotarget-06-29129-s001.pdf]

## SUPPLEMENTARY FIGURES AND TABLES

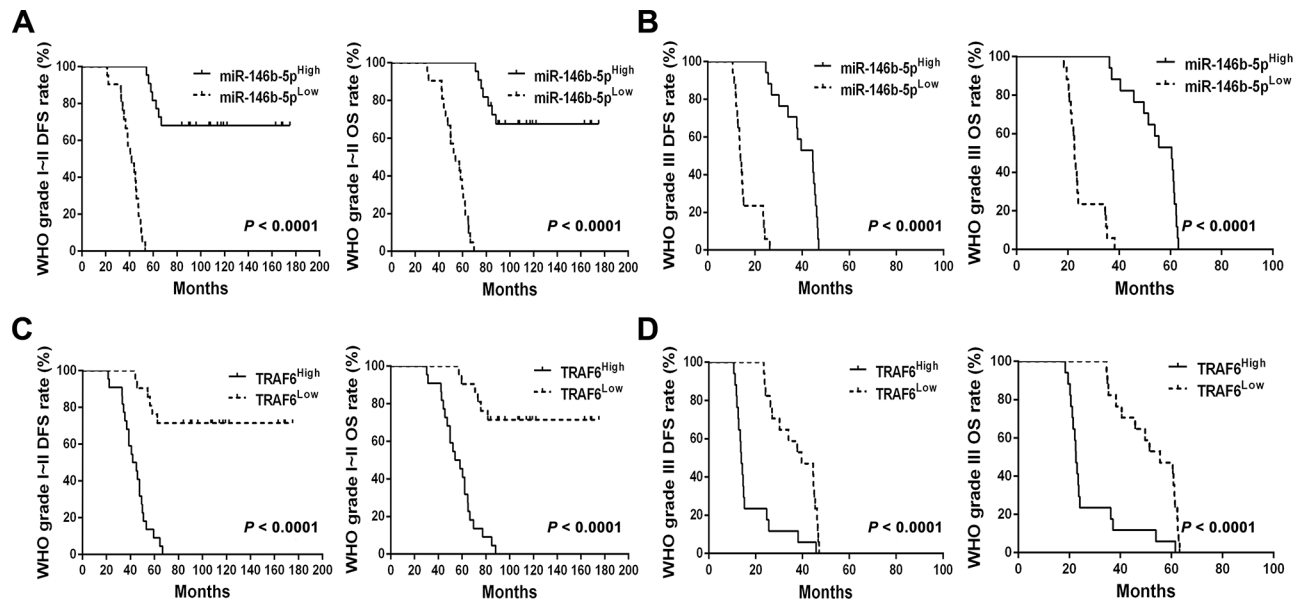

**Supplementary Figure S1: miR-146b-5p and TRAF6 expressions correlate with patients' prognoses.** A and B. Kaplan-Meier analysis of the correlation between miR-146b-5p and DFS (left) or OS (right) of WHO grade I-II glioma patients (A) and WHO grade III glioma patients (B) C and D. Kaplan-Meier analysis of the correlation between TRAF6 and DFS (left) or OS (right) of WHO grade I-II glioma patients (C) and WHO grade III glioma patients (D) The patients of different grade groups were stratified into high and low expression subgroups using the median of miR-146b-5p LIs or TRAF6 LIs.

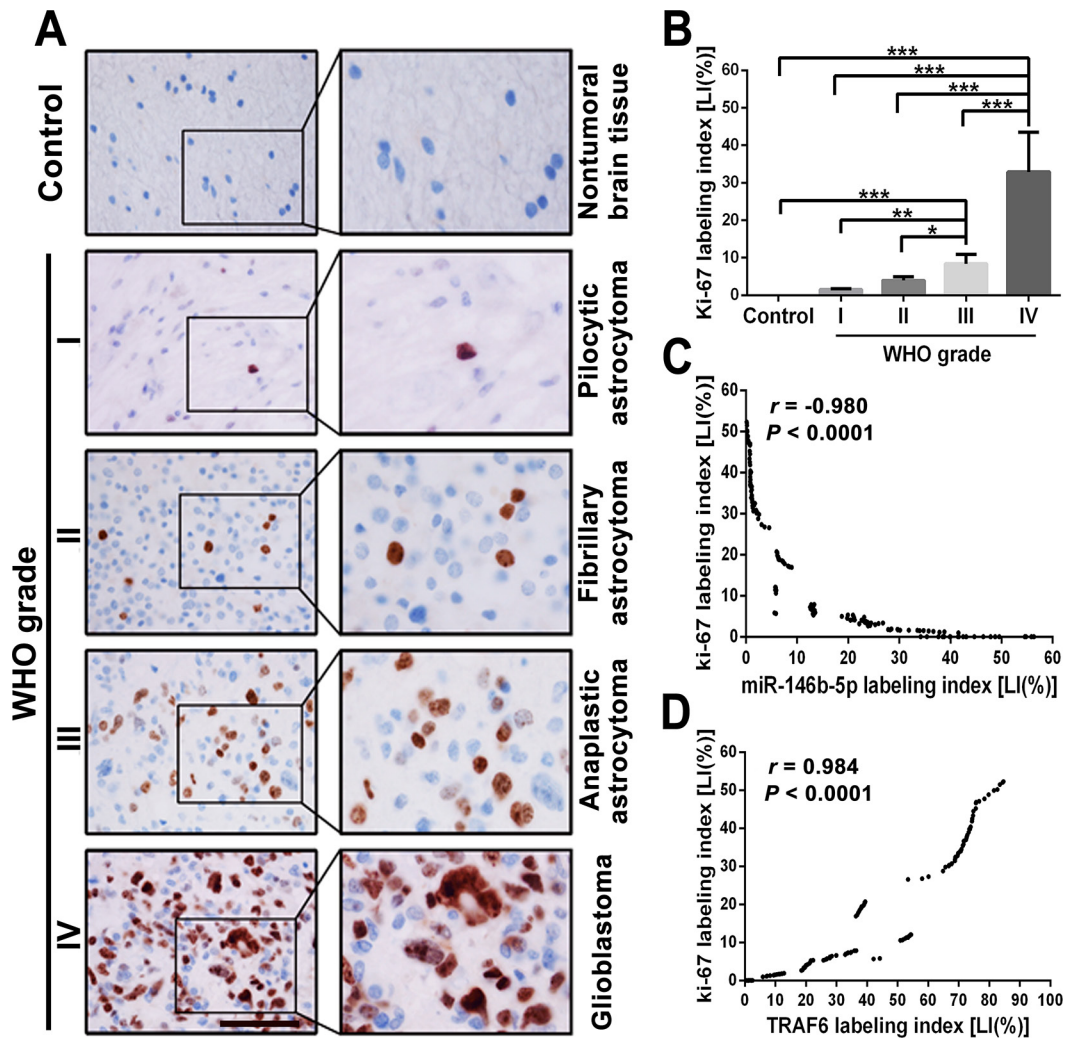

**Supplementary Figure S2: Ki-67 expression correlates with glioma grades and their expressions of miR-146b-5p and TRAF6.** **A.** Representative images of Ki-67 IHC detection. Scale bar, 50  $\mu$ m. **B.** Comparisons among groups of Ki-67 labeling index [LI (%) ] in the FFPE samples of 147 gliomas and 20 nontumoral control brain tissues. The Ki-67 LI (%) of each sample was calculated according to percentage ratio of positive cell number to total cell number in 10 randomly selected microscopic fields at  $\times 400$ , and the data in B are presented as the mean  $\pm$  SD. \* $P < 0.05$ ; \*\* $P < 0.01$ ; \*\*\* $P < 0.001$ . **C** and **D.** Pearson correlation analysis between Ki-67 LIs and miR-146b-5p LIs (C) or TRAF6 LIs (D) in the FFPE samples as indicated.

**Supplementary Table S1: Univariate analysis for DFS and OS in patients with gliomas.**

| Factors              | DFS                 |          | OS                  |          |
|----------------------|---------------------|----------|---------------------|----------|
|                      | HR (95%CI)          | <i>P</i> | HR (95%CI)          | <i>P</i> |
| Gender               | 1.307 (0.921–1.855) | 0.1314   | 1.319 (0.929–1.872) | 0.1218   |
| Age                  | 1.050 (1.038–1.061) | <0.0001  | 1.049 (1.038–1.061) | <0.0001  |
| Predominant side     | 0.787 (0.604–1.027) | 0.0775   | 0.787 (0.603–1.026) | 0.0764   |
| Predominant location | 1.507 (1.341–1.693) | <0.0001  | 1.509 (1.343–1.696) | <0.0001  |
| miR-146b-5p LI       | 0.596 (0.536–0.663) | <0.0001  | 0.638 (0.582–0.699) | <0.0001  |
| TRAF6 LI             | 1.224 (1.185–1.264) | <0.0001  | 1.214 (1.176–1.254) | <0.0001  |
| Ki-67 LI             | 1.489 (1.402–1.582) | <0.0001  | 1.518 (1.427–1.615) | <0.0001  |

Abbreviations: HR, hazard ratio; CI, confidence interval; LI, labeling index.

**Supplementary Table S2: The clinical features of the glioma specimens used in this study.**

| Feature                   | WHO Grade    |               |               |               |
|---------------------------|--------------|---------------|---------------|---------------|
|                           | I (n = 15)   | II (n = 28)   | III (n = 34)  | IV (n = 70)   |
| Gender                    |              |               |               |               |
| Male                      | 7            | 16            | 18            | 46            |
| Female                    | 8            | 12            | 16            | 24            |
| Age (Year, Mean $\pm$ SD) | 13 $\pm$ 6.9 | 41 $\pm$ 12.2 | 46 $\pm$ 14.7 | 60 $\pm$ 12.1 |
| Predominant side          |              |               |               |               |
| Left                      | 6            | 13            | 15            | 38            |
| Right                     | 5            | 13            | 17            | 31            |
| Middle                    | 4            | 2             | 2             | 1             |
| Predominant location      |              |               |               |               |
| Frontal lobe              | 0            | 23            | 23            | 32            |
| Temporal lobe             | 0            | 2             | 5             | 26            |
| Parietal lobe             | 0            | 1             | 4             | 5             |
| Occipital lobe            | 0            | 0             | 1             | 5             |
| Pineal body               | 1            | 0             | 0             | 0             |
| Saddle area               | 1            | 0             | 0             | 0             |
| Thalamus                  | 1            | 0             | 0             | 0             |
| Cerebellum                | 12           | 2             | 0             | 2             |
| Third ventricle           | 0            | 0             | 1             | 0             |

Abbreviation: SD, Standard deviation.

**Supplementary Table S3: Primers used for TRAF6 3'-UTR RT-PCR amplification.**

| Primers | Sequence                                 |
|---------|------------------------------------------|
| Forward | 5'-GCGATCGCTATATGTAATATATTTAAAAGTGAAA-3' |
| Reverse | 5'-GGAGCTCAAATAATTAAGGTTATATTTAGG-3'     |

**Supplementary Table S4: miR-146b-5p, TRAF6 siRNA and Negative control.**

| dsRNA              | Sequence                     |
|--------------------|------------------------------|
| miR-146b-5p mimics | 5'-UGAGAACUGAAUCCAUAAGGCU-3' |
|                    | 3'-UUACUCUUGACUUAAGGUAUCC-5' |
| TRAF6 siRNA        | 5'-GCCUAAUCAUUAUGAUCUATT-3'  |
|                    | 3'-TTCGGAUUAGUAAUACUAGAU-5'  |
| Negative control   | 5'-UUCUCCGAACGUGUCACGUTT-3'  |
|                    | 3'-TTAAGAGGCUUGCACAGUGCA-5'  |

**Supplementary Table S5: Primers used for TRAF6 mRNA qRT-PCR detection.**

| Primers | Sequence |                                 |
|---------|----------|---------------------------------|
| TRAF6   | forward  | 5'-TGCTTGATGGCATTACGAGAA-3'     |
|         | reverse  | 5'-CATTTGGACATTTCCACCATCAGAG-3' |
| GAPDH   | forward  | 5'-TGCACCACCAACTGCTTAGC-3'      |
|         | reverse  | 5'-GGCATGGACTGTGGTCATGAG-3'     |
